# Supplementary material
Source: publisher figshare collection journal article supplement (https://frontiersin.figshare.com/ndownloader/files/24256919)
Supplement: Supplementary file [file 24256919]

**Supplementary Table 1. Primers used for RT-PCR amplification in this study.**

| Primer Name    | Sequence                      |
|----------------|-------------------------------|
| GADPH-Forward  | 5'-ACCACAGTCCATGCCATCA -3'    |
| GADPH-Reverse  | 5'-TCCACCACCCTGTTGCTGTA -3'   |
| ATG7-Forward   | 5'-GATGGAGAGCTCCTCAGCA -3'    |
| ATG7-Reverse   | 5'-ATTGCTGCATCAAGAAACCC -3'   |
| ULK1-Forward   | 5'-AAGAGCCTGATGGTGTCTCCTC -3' |
| ULK1 -Reverse  | 5'-GTGGCCCTGTACGACTTCC -3'    |
| PRL3-Forward   | 5'-AGAAGTACGGGGCTACCACTG -3'  |
| PRL3 -Reverse  | 5'-CGCTCTCAATAAGCGCCAG -3'    |
| ATG12-Forward  | 5'-TTGTGGCCTCAGAACAGTTG -3'   |
| ATG12 -Reverse | 5'-CCATCACTGCCAAAACACTC -3'   |
| p62-Forward    | 5'-TACAAGGGAAGTGGCTATC-3'     |
| p62 -Reverse   | 5'-TTACACTGACAATTTCATCC-3'    |

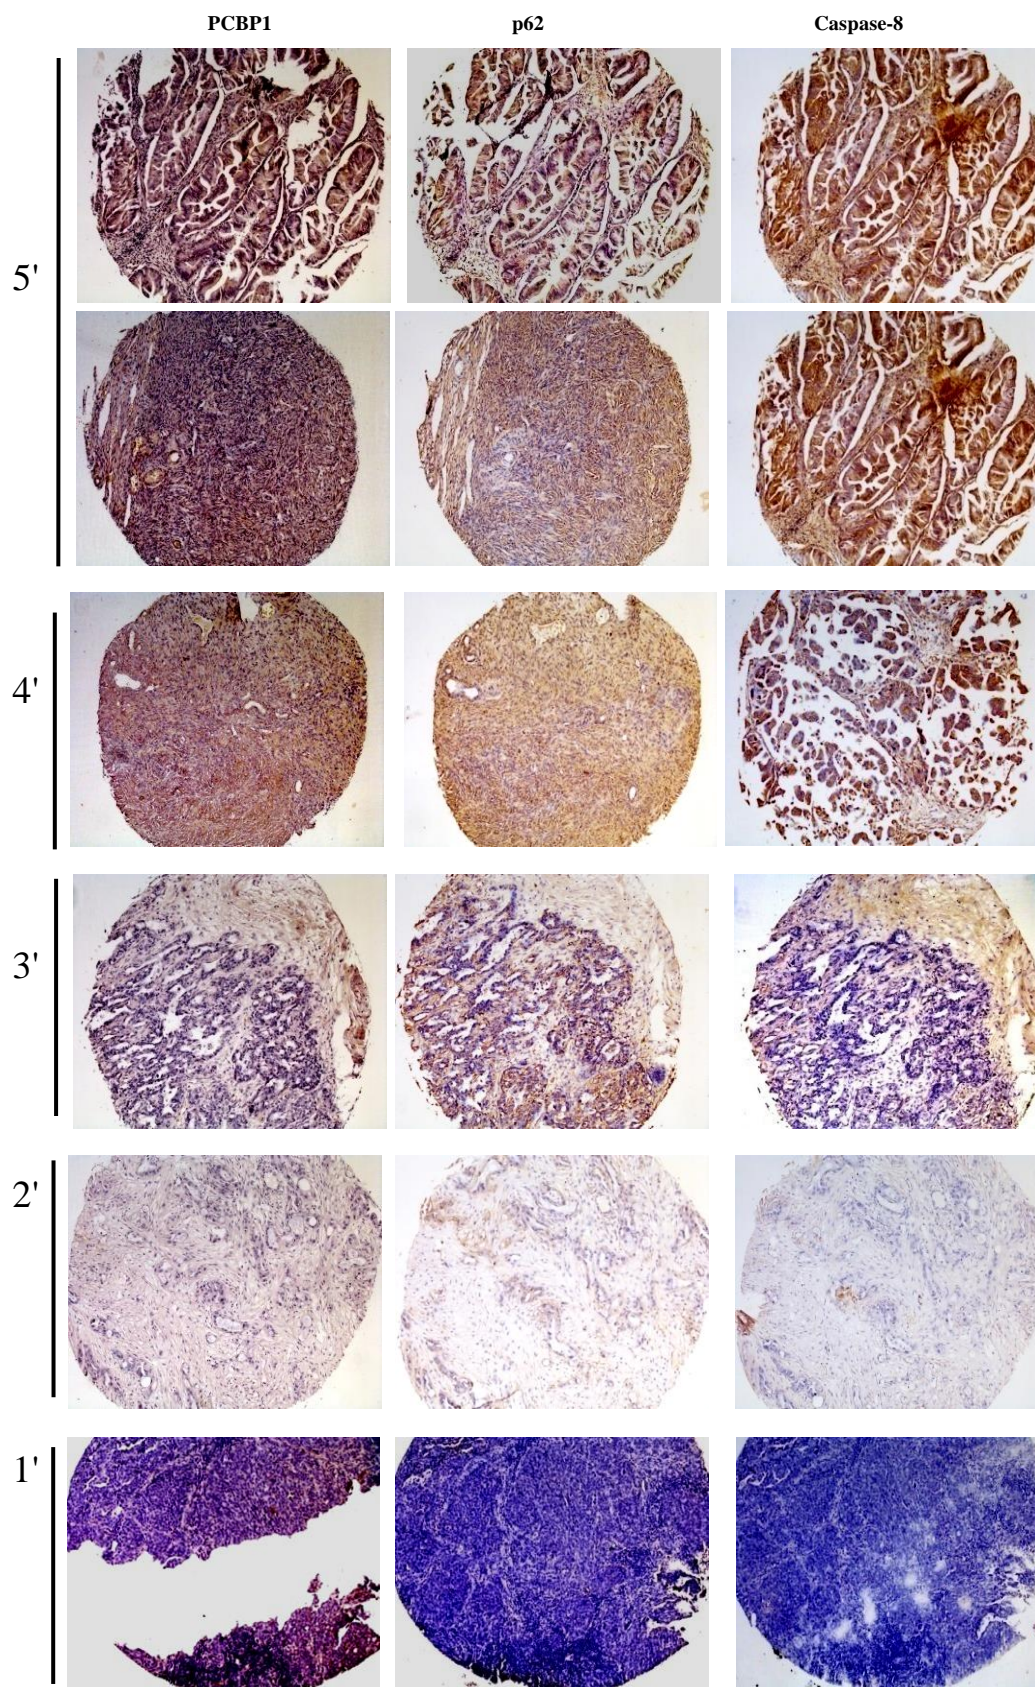

**Supplementary Figure 1. Scores of PCBP1, p62 and caspase 8 expression based on IHC staining intensity.**

**A****Normal****Tumor**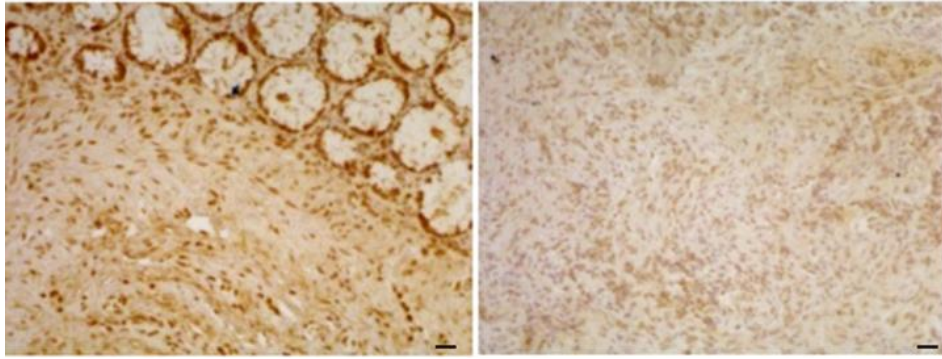**B**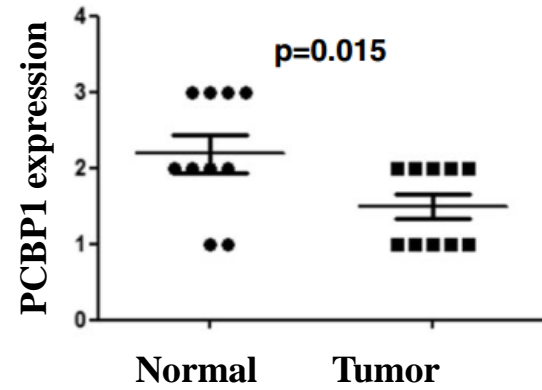

**Supplementary Figure 2. PCBP1 protein expression in the paired adjacent normal and tumor regions of human colorectal cancer.** (A) Representative IHC staining of PCBP1 protein expression in the paired adjacent normal and tumor regions of colorectal. Scale bars are equal to 50  $\mu$ m. (B) Statistical analysis of PCBP1 in 10 paired fresh normal and malignant tissues of colorectal tissues. The paired student t test was carried out to check the group difference. p values are shown.

**A**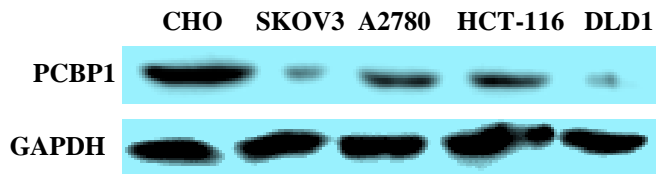**C**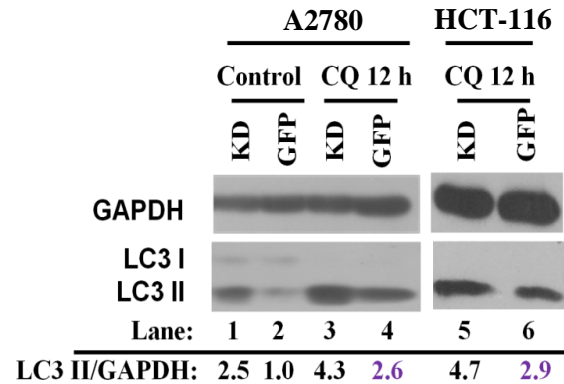**B**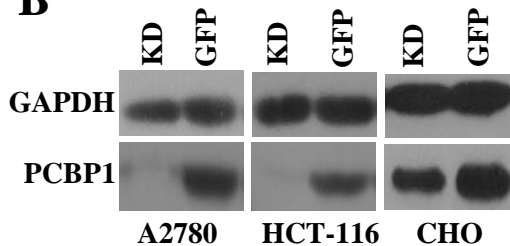

**Supplementary Figure 3. Endogenous PCBP1 knockdown increases autophagic flux.**

(A) Immunoblots of PCBP1 in the A2780, SKOV3, DLD-1 and HCT-116 cell lines.

(B) Immunoblots of PCBP1 by the specific siRNA transfection;

(C) Western blots of LC3 B in the indicated cells with GFP-PCBP1 (PCBP1) and the GFP-expressing control cells. GAPDH is used as a loading control. Protein bands' intensity ratio of LC3II to GAPDH were quantified and normalized, and shown under each lane, respectively.

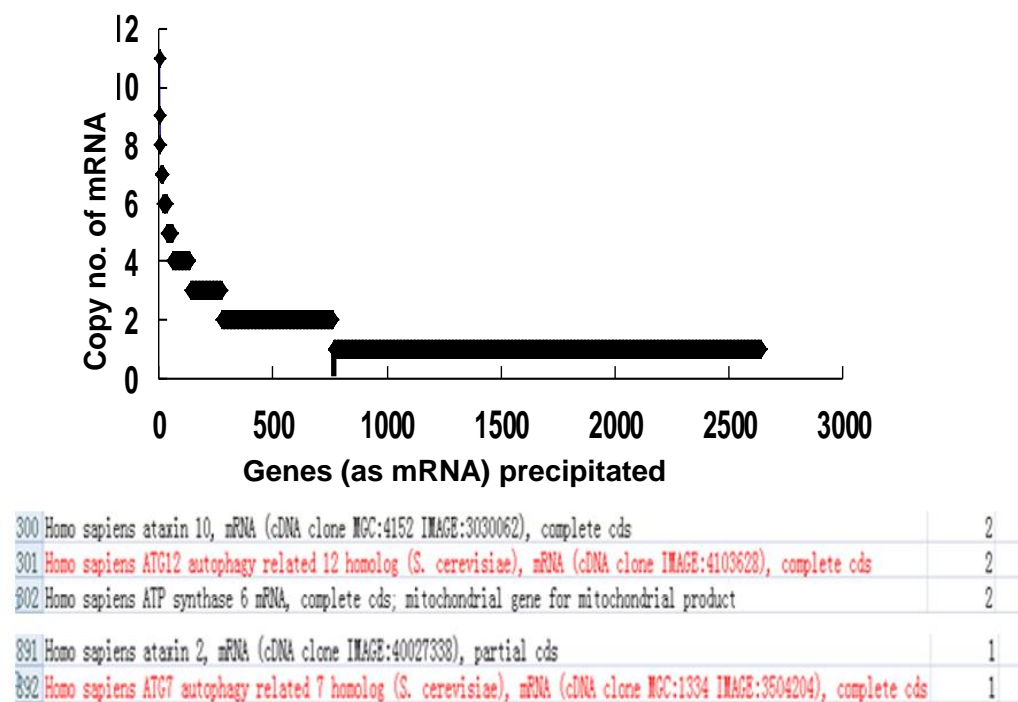

#### Supplementary Figure 4. Genes precipitated in PCBP1 antibody-mediated RNA IP.

The bound mRNAs are identified by RNA sequencing. Copy number of each gene is indicated in Y-axis, and the total number of PCBP1-bound mRNAs are shown in X-axis. – Autophagy-related ATG7 and ATG 12 are shown in the lower panel in red.

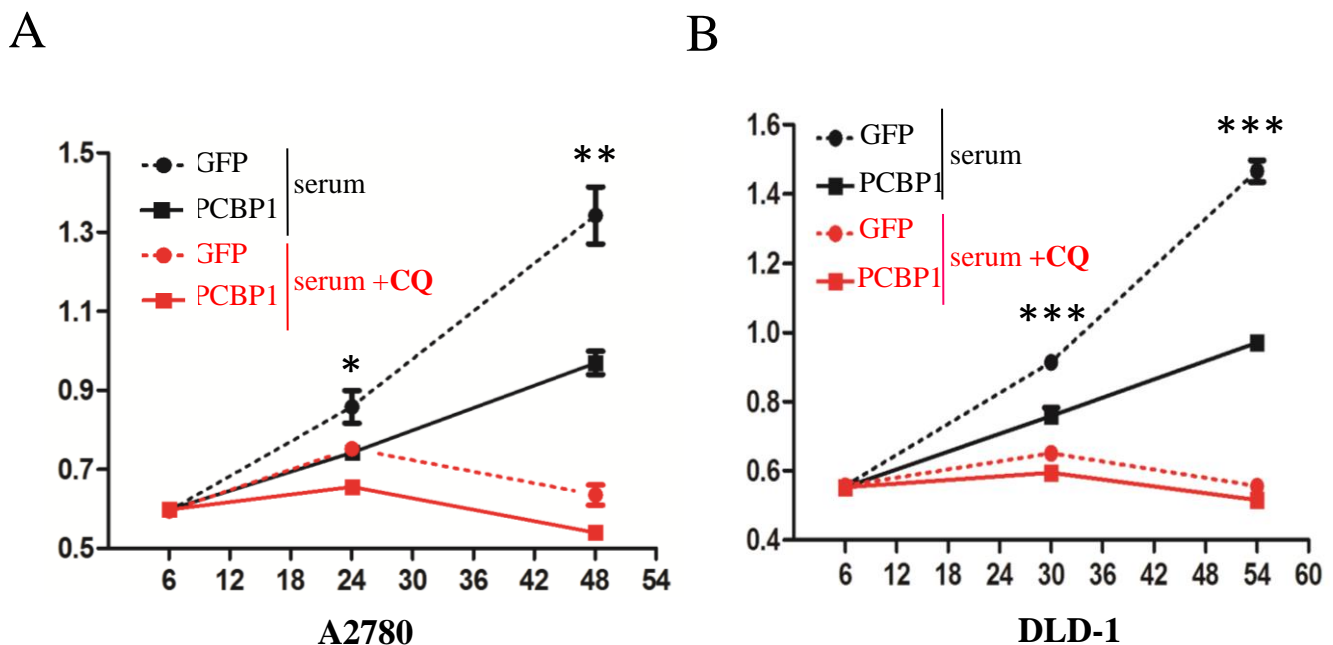

**Supplementary Figure 5. (A) and (B) CCK8 cell proliferation analyses of A2780 (A) and DLD-1 (B) cells with exogenous PCBP1 in the absence or presence of autophagic inhibitor CQ at 50  $\mu$ M. Data presented are mean  $\pm$  SD. NS: No Significance; \*  $P < 0.05$ ; \*\*  $P < 0.01$ ; \*\*\*  $P < 0.001$ ,  $n=3$ .**

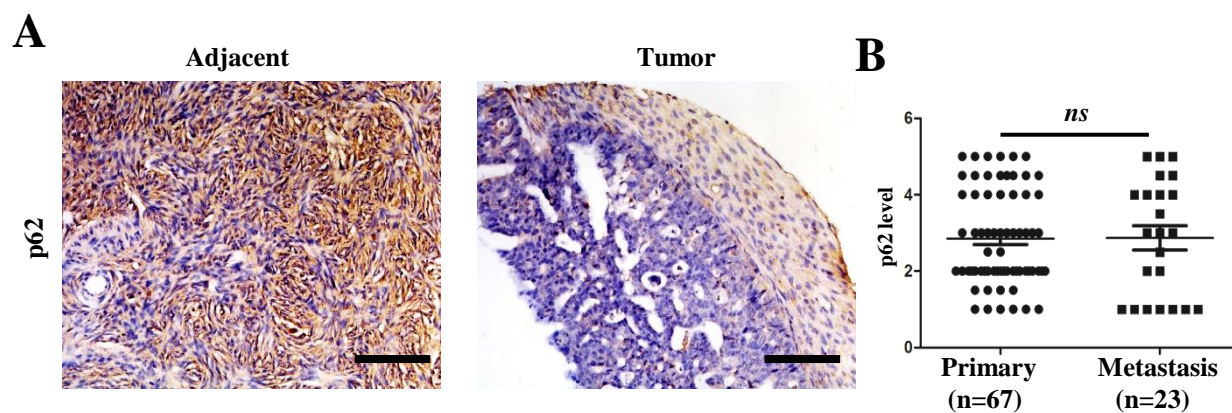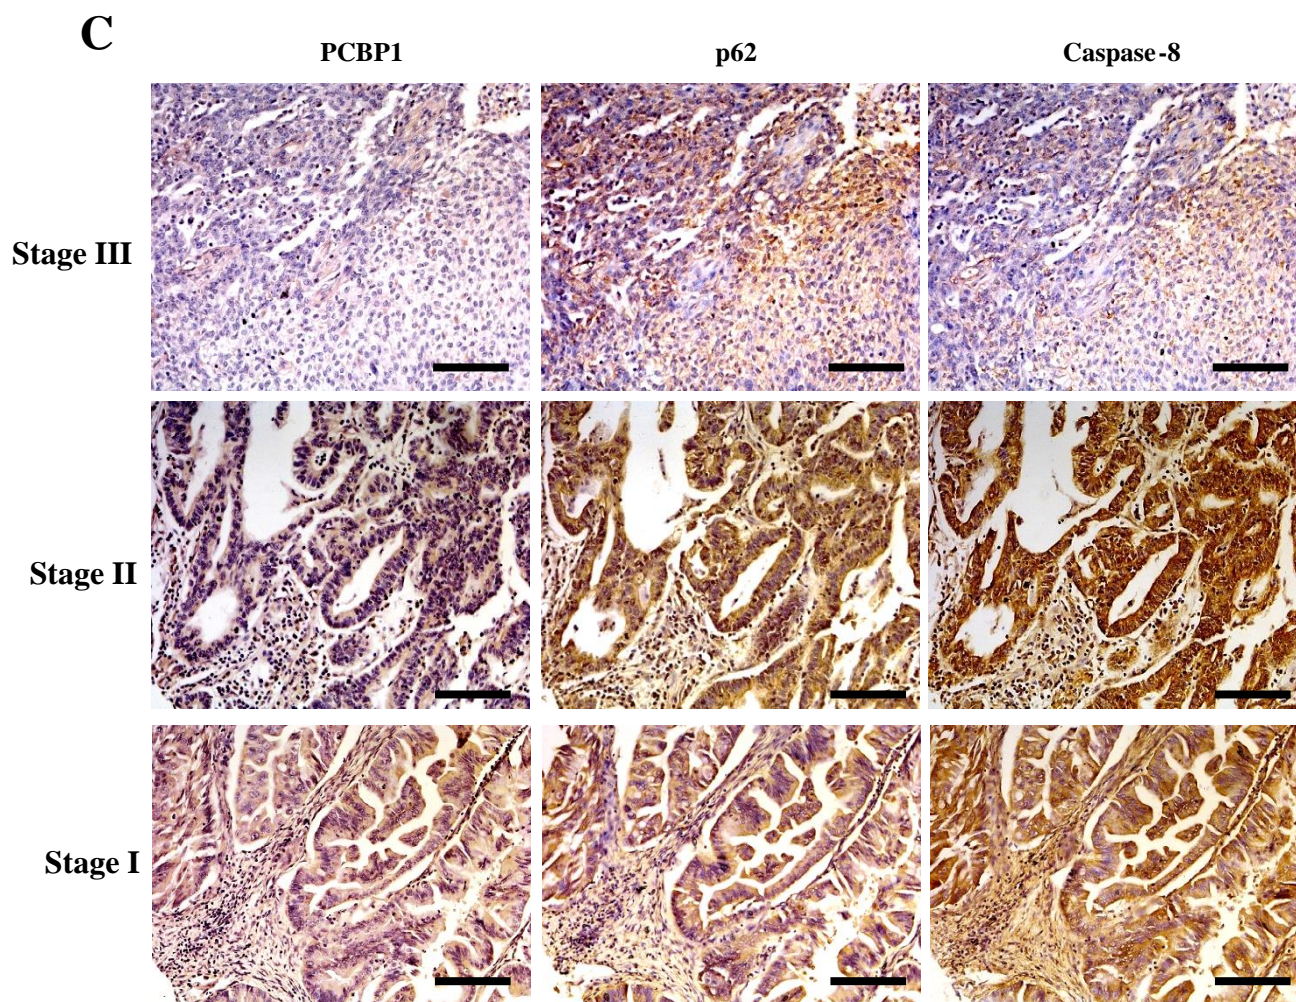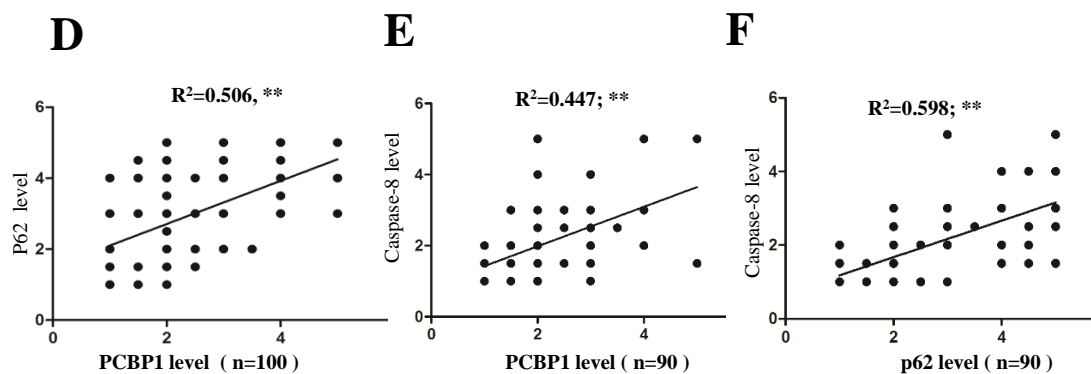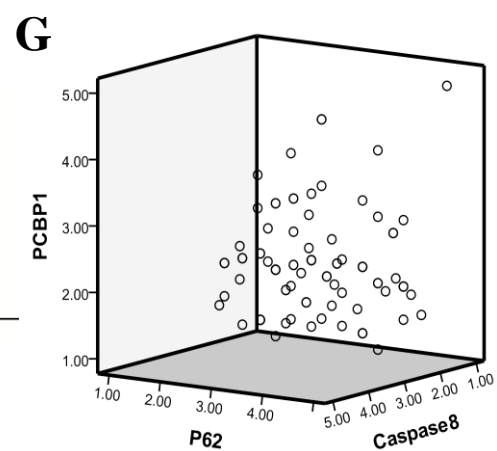

**Supplementary Figure 6**

**Supplementary Figure 6. Relevance of PCBP1 to p62 and caspase 8 in ovary cancers.**

- (A) Representative immunohistochemistry (IHC) analysis of p62 expression in the paired adjacent normal tissues and ovarian tumor samples. All pictures are photographed with 200X amplification. Scale bars are equal to 100  $\mu$ m.
- (B) The statistical comparison of p62 expression between primary and metastatic tumor tissues .
- (C) Representative immunohistochemistry (IHC) analysis of PCBP1, p62 and caspase 8 expressions in the same typical patient stage I-III. All pictures are photographed with 200X amplification. Scale bars are equal to 100  $\mu$ m.
- (D) Correlationship of PCBP1 expression to p62.
- (E) Correlationship of PCBP1 expression to caspase-8.
- (F) Correlationship of p62 expression to caspase-8.
- (G) Schematic correlations among PCBP1, p62 and caspase 8 expressions in 90 ovary tumor samples.
